# Supplementary material
Source: PubMed Central journal article supplement (PMC4656139)
Supplement: NIHMS695791-supplement.pdf [file NIHMS695791-supplement.pdf]

**Computer Simulations  
of Radial-Arm Maze Choice Behavior**
